# Supplementary material for: Single-Cell Profiling Defines Transcriptomic Signatures Specific to Tumor-Reactive versus Virus-Responsive CD4+ T Cells
Source: Cell Rep. Author manuscript; Available in PMC 2019 Dec 27. (PMC6934378; doi:10.1016/j.celrep.2019.10.131)
Supplement: 1 [file NIHMS1545825-supplement-1.pdf]

**Cell Reports, Volume 29**

## **Supplemental Information**

### **Single-Cell Profiling Defines Transcriptomic Signatures Specific to Tumor-Reactive versus Virus-Responsive CD4<sup>+</sup> T Cells**

**Assaf Magen, Jia Nie, Thomas Ciucci, Samira Tamoutounour, Yongmei Zhao, Monika Mehta, Bao Tran, Dorian B. McGavern, Sridhar Hannenhalli, and Rémy Bosselut**

**A**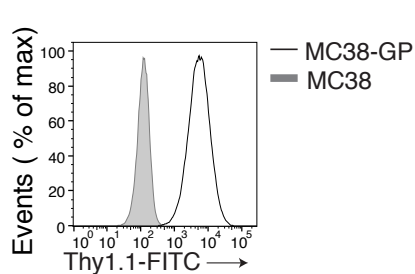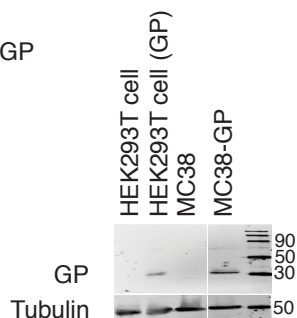**C**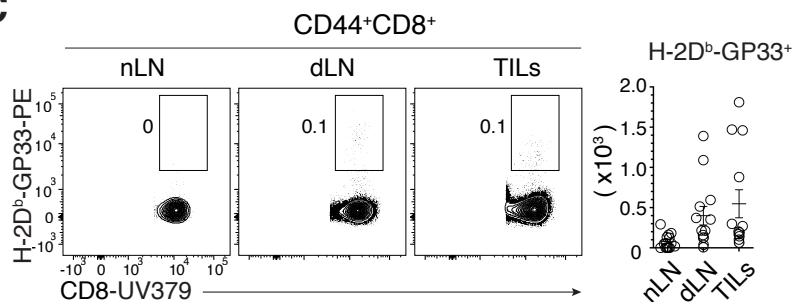**D**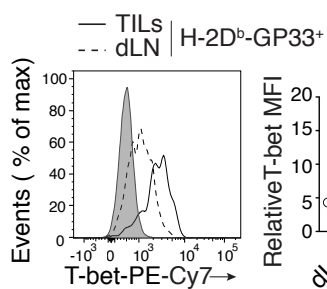**E**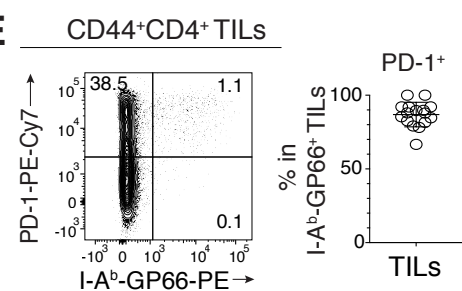**G**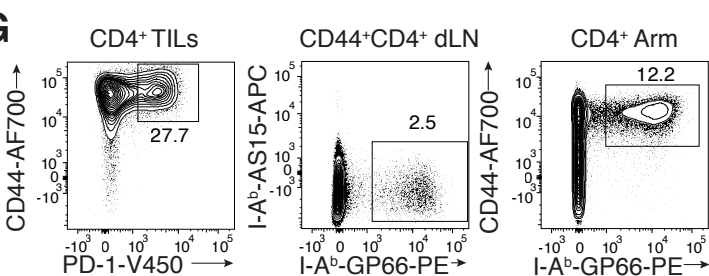**B**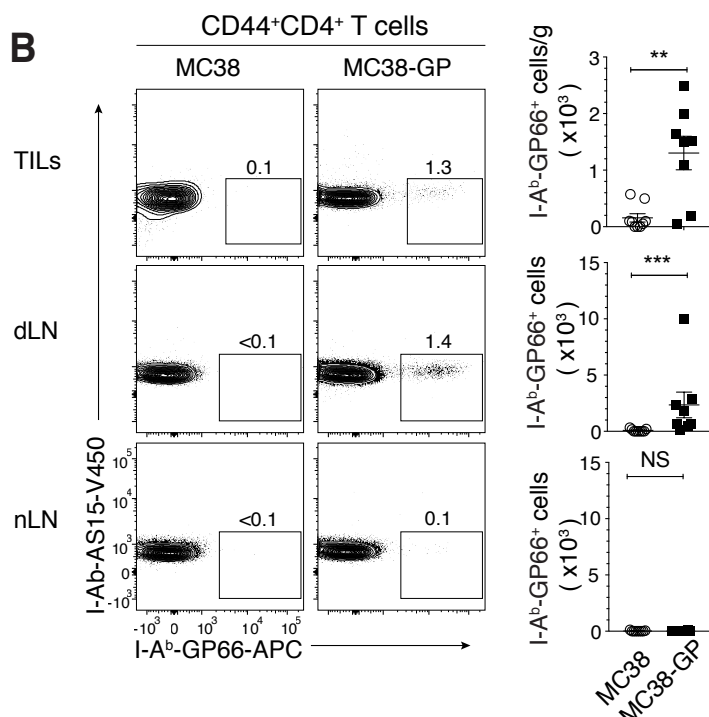**F**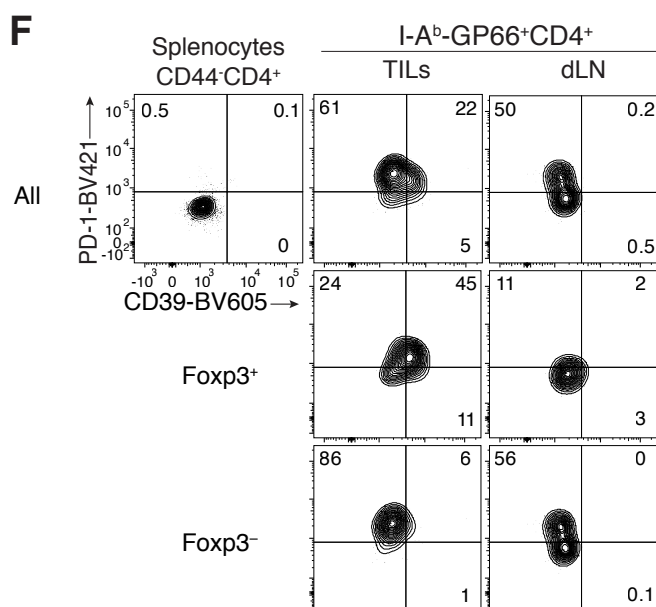

**Figure S1. Characterization of antigen-specific CD4<sup>+</sup> T cell responses in MC38 colon adenocarcinoma tumors, Related to Figure 1.**

(A) Overlaid protein expression of Thy1.1 in MC38 and MC38-GP cells (left). Immunoblot analysis of GP protein expression in HEK293T cells, HEK293T cells transfected with pMRX-GP-IRES-Thy1.1 plasmid, MC38 cells or MC38-GP cells (right).

(B) C57BL/6 mice were subcutaneously injected MC38 or MC38-GP cells and analyzed at day 14 post-injection. Left panel shows flow cytometry contour plots of GP66 vs. control (AS15 peptide from *T. gondii*) class II tetramer staining in TILs, dLN and nLN from MC38 and MC38-GP tumor-bearing mice. Right panel shows the number of GP66<sup>+</sup> TILs per gram of tumor and total number of GP66<sup>+</sup> dLN and nLN cells, separately for MC38 and MC38-GP tumor-bearing mice (Unpaired Mann-Whitney U test, \*\* p < 0.01, \*\*\* p < 0.001, NS: not significant). Data is from 8 mice of each condition analyzed in two experiments.

(C) Flow cytometry analysis of CD8 expression vs. GP33 class I tetramer staining in nLN, dLN and TILs from MC38-GP tumor-bearing mice (left). Total number of GP33<sup>+</sup> dLN and nLN cells, and number of GP33<sup>+</sup> TILs per gram of tumor (right). Data is from 13 mice analyzed in three experiments.

(D) Overlaid protein expression of Tbet in GP33<sup>+</sup> CD8<sup>+</sup> dLN and TILs; grey shaded histogram shows Tbet expression in naïve CD8<sup>+</sup> splenocytes from tumor-free control mice; histogram shows concatenated data from 6 individual mice analyzed in one experiment. Graph on the right shows Tbet MFI in GP33<sup>+</sup> dLN and TILs; data is from 9 tumor bearing mice analyzed in two experiment and is expressed relative to naïve CD8<sup>+</sup> splenocytes from tumor-free control mice. Each symbol represents an individual mouse.

(E) Flow cytometry contour plots of GP66 tetramer vs. PD-1 staining in TILs (left) and percentage of PD-1<sup>+</sup> cells out of GP66<sup>+</sup> TILs (right). Data is from 16 mice analyzed in three experiments.

(F) Right two columns show flow cytometry expression of PD-1 vs. CD39 in GP66<sup>+</sup>CD4<sup>+</sup> TILs or dLN, gated on all such cells (top row) or Foxp3<sup>+</sup> or Foxp3<sup>-</sup> subsets (bottom rows). Top left plot shows staining of naïve splenocytes from tumor-free mice. Data is representative from 11 mice analyzed in three experiments.

(G) GP66-specific CD44<sup>hi</sup> CD4<sup>+</sup> splenocytes were isolated from WT animals 7 days post-infection with LCMV Armstrong. Protein expression contour of populations used for scRNAseq captures from MC38-GP tumor-bearing mice (TILs PD-1 vs. CD44, dLN GP66 vs. AS15 control) and LCMV Armstrong infected mice (GP66 vs. CD44). Data is representative from >50 mice analyzed in >10 experiments.

**A**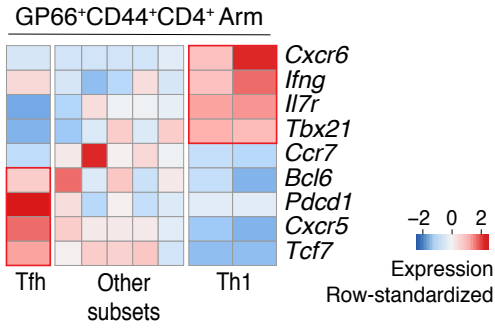**B**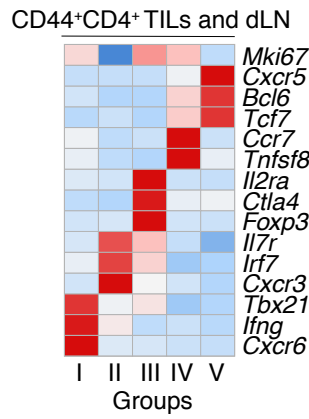**C**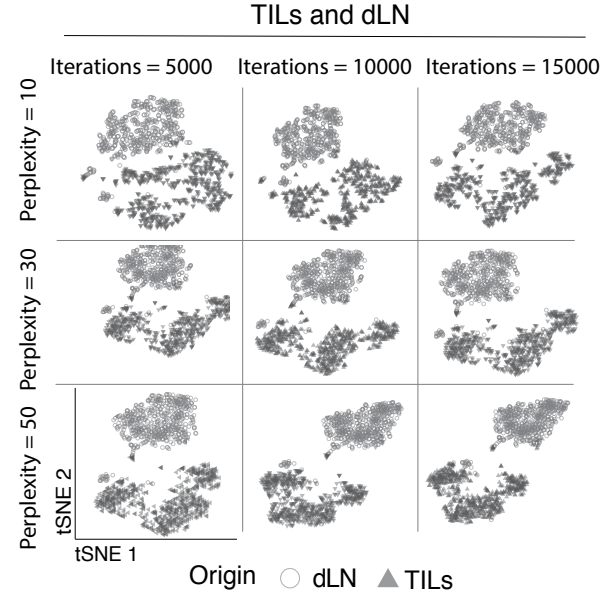**D**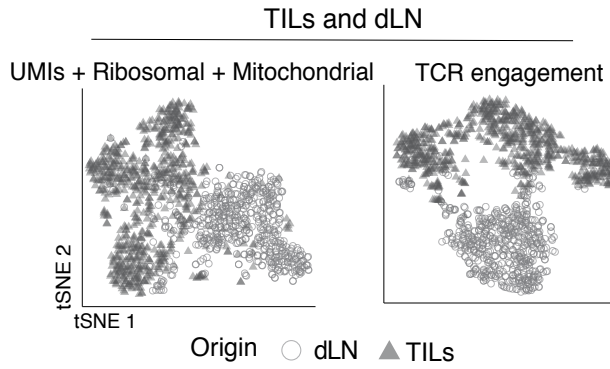**E**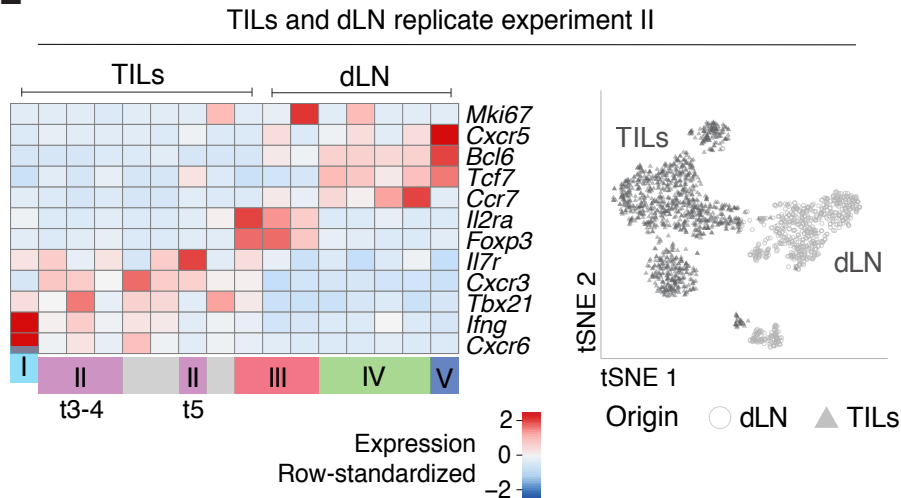**H**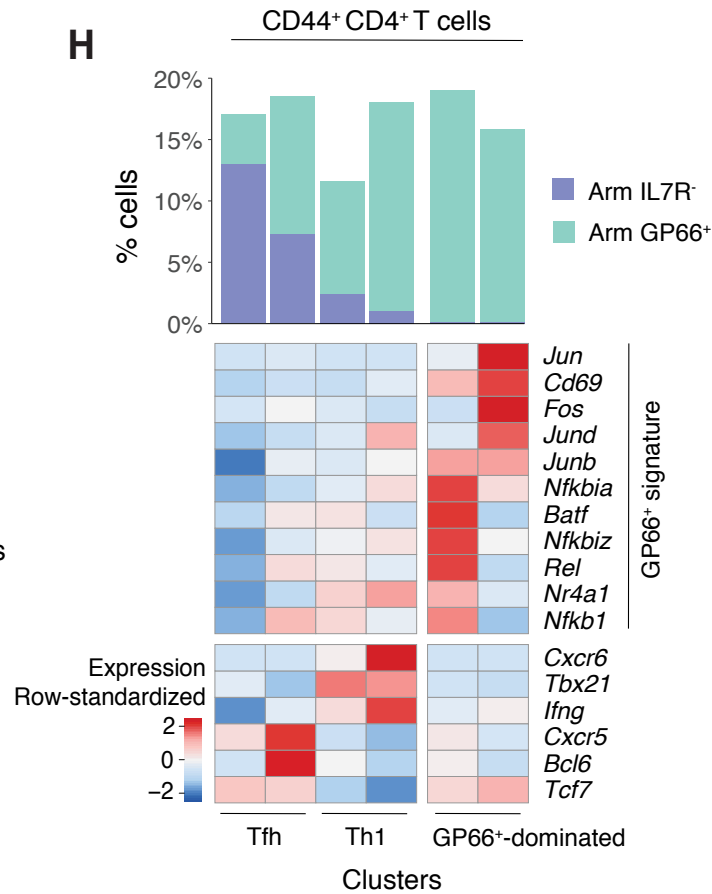**F**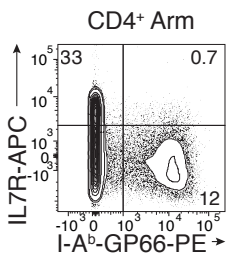**G**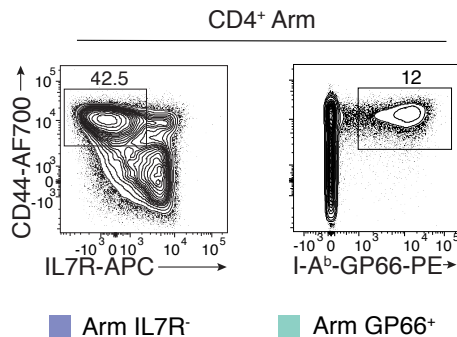

**Figure S2. Characterization of immune responses to Arm and MC38-GP by scRNAseq, Related to figures 1 and 2.**

**(A)** GP66-specific CD4<sup>+</sup> splenocytes from WT animals 7 days post-infection with LCMV Armstrong analyzed by scRNAseq. Heatmap shows row-standardized expression of selected genes across Arm clusters.

**(B-E)** TILs and dLN cells from WT mice at day 14 post MC38-GP injection analyzed by scRNAseq. **(B)** Heatmap shows row-standardized expression of selected genes across main TIL and dLN groups (as defined in text). **(C)** tSNE display of TILs and dLN cells generated using different parameter combination of perplexity and number of iterations, grey-shaded by tissue origin. **(D)** tSNE displays of TILs and dLN cells, grey-shaded by tissue origin, post confounder correction for number of unique molecular identifiers (UMIs) and expression of ribosomal and mitochondrial coding genes (left) or TCR engagement on dLN cells as a result of GP66-tetramer-based purification (right). **(E)** scRNAseq analysis of TILs and dLN cells from replicate experiment II. Heatmap shows row-standardized expression of selected genes across TIL and dLN clusters (left). tSNE display of TILs and dLN cells, grey-shaded by tissue origin (right).

**(F-H)** Analysis of CD4<sup>+</sup> splenocytes from C57BL/6 animals 7 days post-infection with LCMV Armstrong (Arm). **(F)** Flow cytometry contour plot of GP66 tetramer staining vs. IL7R in CD4<sup>+</sup> Arm cells. **(G)** Flow cytometry contour plots of IL7R vs. CD44 (for Arm IL7R<sup>-</sup> sample, **left**) and GP66 vs. CD44 (for Arm GP66<sup>+</sup> sample, **right**). **(H)** Arm IL7R<sup>-</sup> and Arm GP66<sup>+</sup> cells analyzed by scRNAseq. Heatmap shows row-standardized expression of selected genes across pooled Arm IL7R<sup>-</sup> and Arm GP66<sup>+</sup> clusters (**bottom**). Bar plot indicates the number of Arm IL7R<sup>-</sup> and Arm GP66<sup>+</sup> cells in each cluster relative to the total number of cells (**top**).

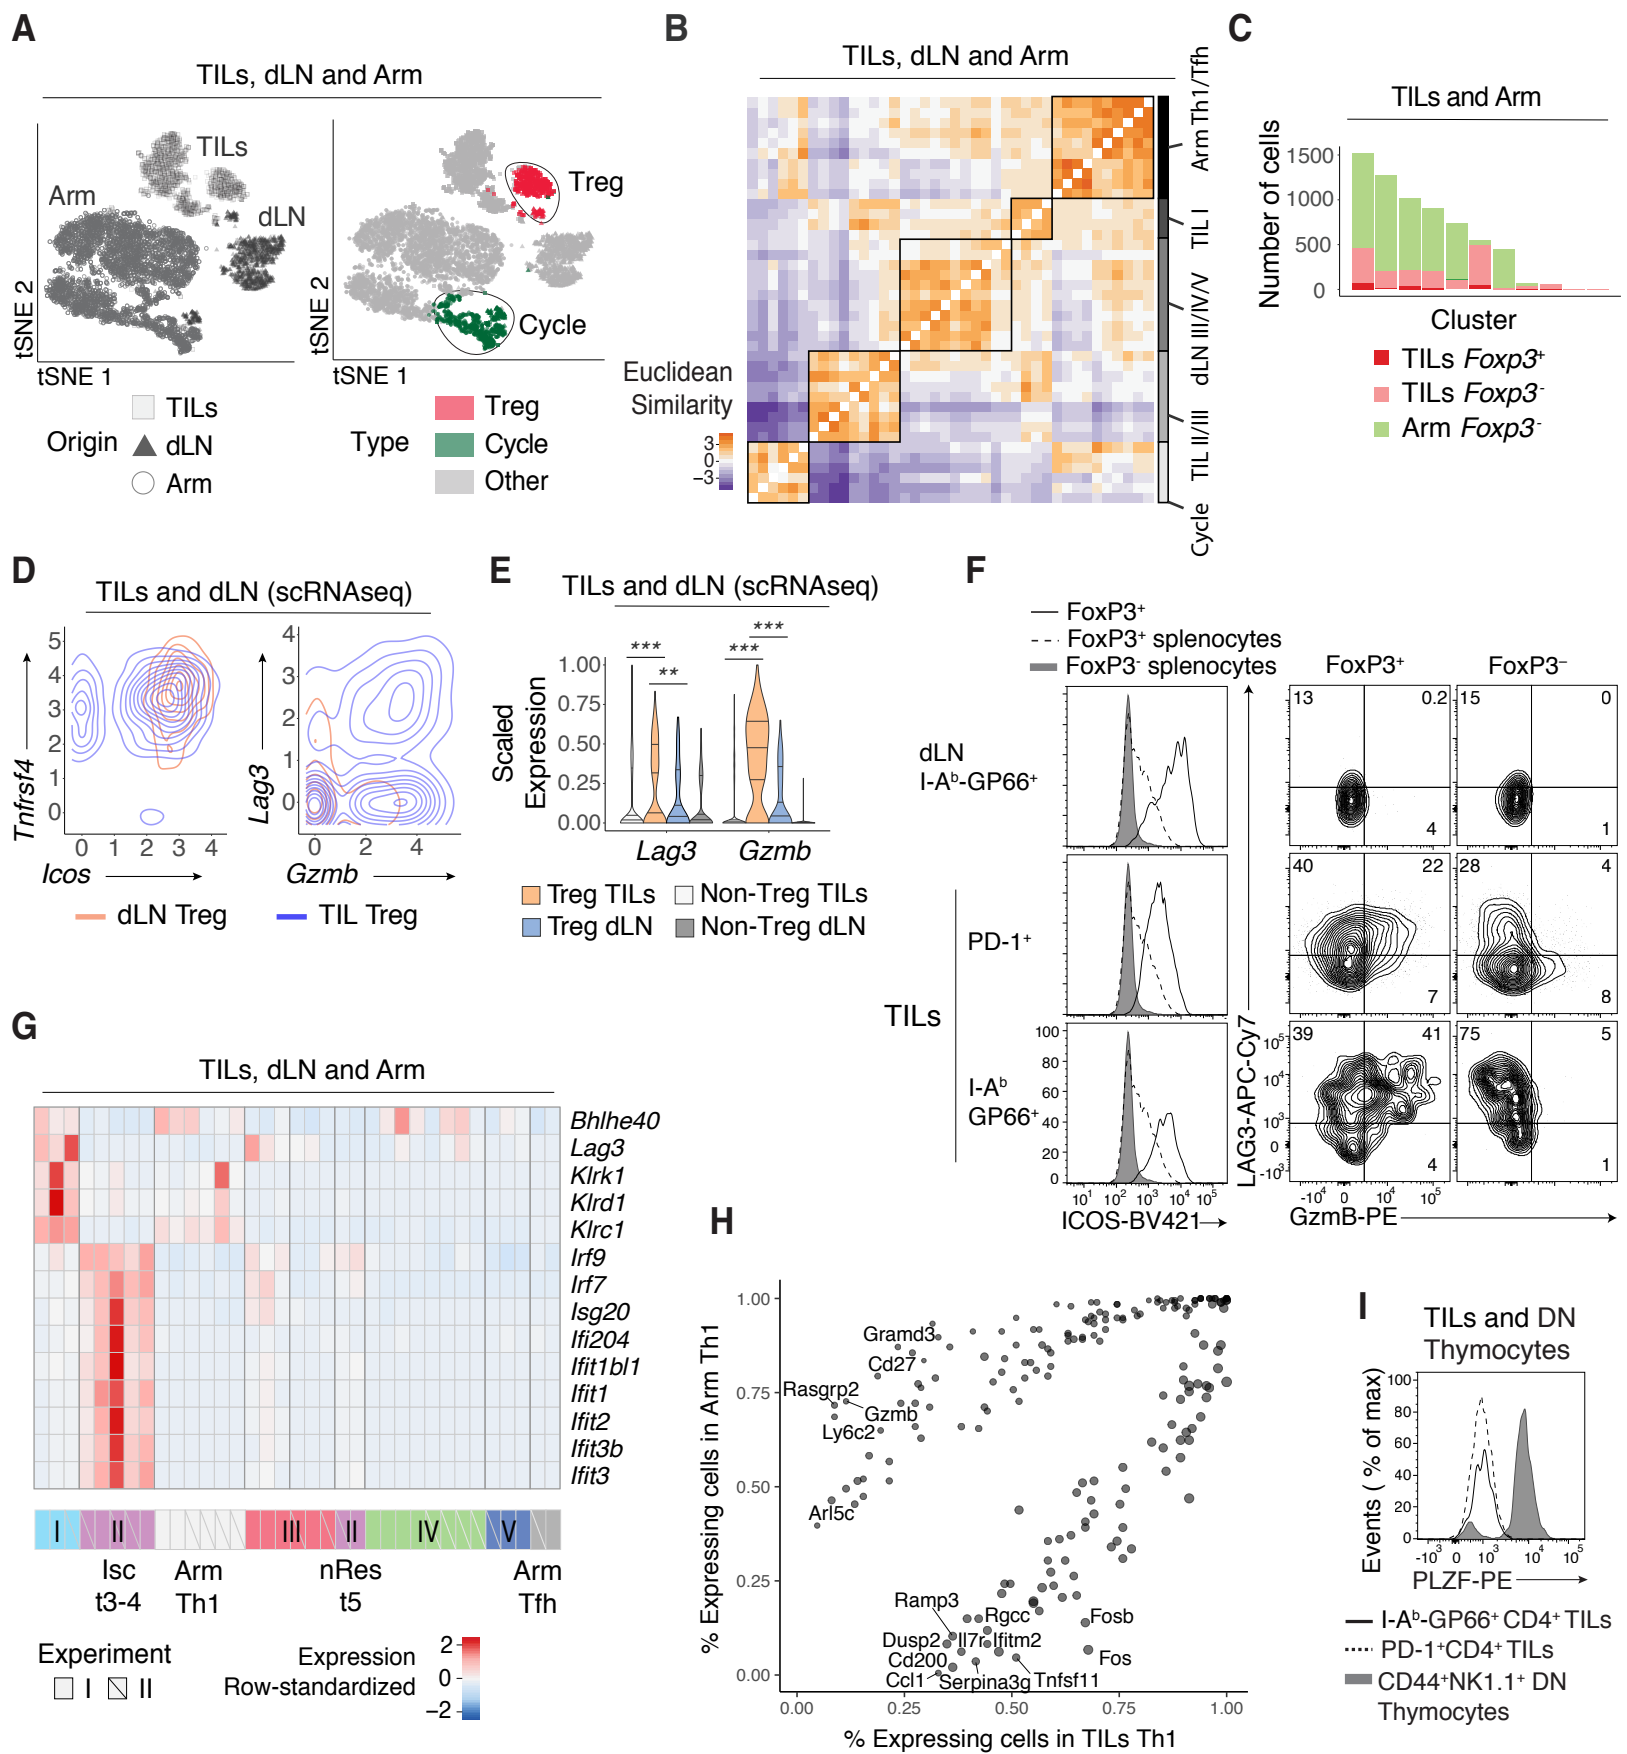

**Figure S3. Assessment of tissue-context-specific effects on clustering analyses and TILs-dLN heterogeneity, Related to Figure 3.**

**(A-C, G,H)** TILs, dLN and Arm cells from replicate experiments I and II analyzed by scRNAseq. **(A)** tSNE plots show TILs, dLN, and Arm cells, grey-shaded by origin (left) or color-coded by Treg or cell-cycle (Cycle) clustering assignment (grey for all other clusters) (right). **(B)** Heatmap shows Euclidean similarity between cluster-specific average expression vectors (as defined in text) (left) annotated with cluster origin and cluster group or type (right). **(C)** Bar plot shows relative cluster composition of Foxp3<sup>+</sup> or Foxp3<sup>-</sup> TILs and Foxp3<sup>-</sup> Arm (no Foxp3<sup>+</sup> cells found in GP66<sup>+</sup> Arm) after applying a data integration approach (Butler et al., 2018).

**(D-E)** Comparison of dLN Tregs and TIL Tregs (respectively clusters t6-7 and n1 as shown in Fig. 1A). **(D)** Contour plots of dLN Treg (orange) or TIL Treg (blue) cell distribution according to scRNAseq-detected normalized expression of *Icos* vs. *Tnfrsf4* (left) and *Gzmb* vs. *Lag3* (right). **(E)** Violin plot of *Lag3* and *Gzmb* scRNAseq expression in Treg vs. non-Treg TIL and dLN populations (Unpaired T test, \*\* p < 0.01, \*\*\* p < 0.001); bands indicate quartiles (25<sup>th</sup>, 50<sup>th</sup> and 75<sup>th</sup> quantile).

**(F)** Overlaid flow cytometry expression of ICOS in Foxp3<sup>+</sup> TILs and dLN cells and Foxp3<sup>+</sup> or Foxp3<sup>-</sup> CD4<sup>+</sup> splenocytes from tumor-free control mice (left). Data is representative from 11 mice analyzed in three experiments. Flow cytometry contour plots of Granzyme B vs. LAG3 in Foxp3<sup>+</sup> TILs or Foxp3<sup>+</sup> dLN cells (middle), and Foxp3<sup>-</sup> TILs or Foxp3<sup>-</sup> dLN (right). Graphs were generated from 5 concatenated files, each of them representing a single mouse and processed in parallel in one experiment. Data is representative of 2 such experiments.

**(G)** Heatmap shows row-standardized expression of TIL Tsc and Th1 characteristic genes across TIL, dLN and Arm clusters.

**(H)** Gene detection statistics (% expressing cells) of differentially expressed genes by scRNAseq in TILs Th1 and Arm Th1.

**(I)** Overlaid protein expression of PLZF in GP66<sup>+</sup> and PD-1<sup>+</sup> TILs and CD44<sup>hi</sup> NK1.1<sup>+</sup> DN (double negative CD4<sup>-</sup>CD8<sup>-</sup>) thymocytes from tumor-free control mice. Data is representative from 10 mice analyzed in two experiments.

**A**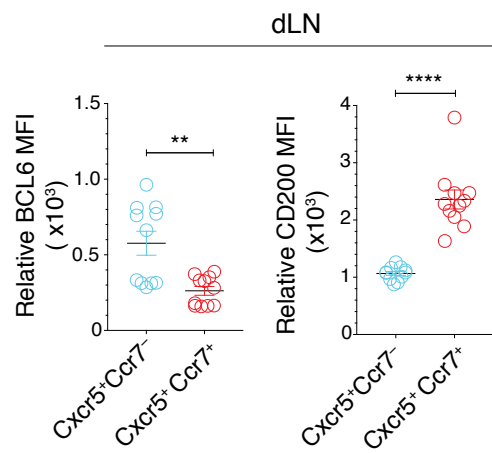**B**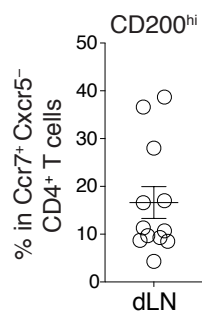**C**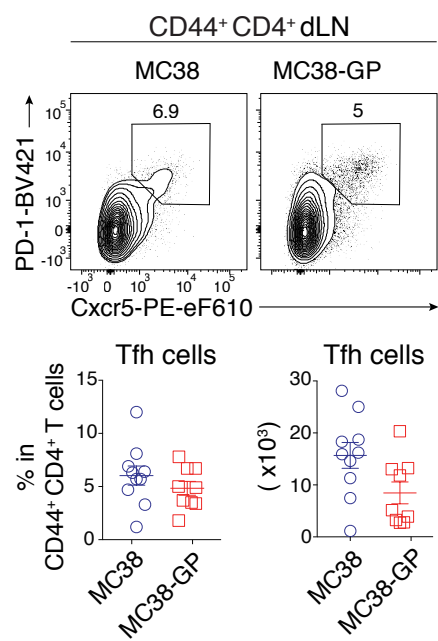**D**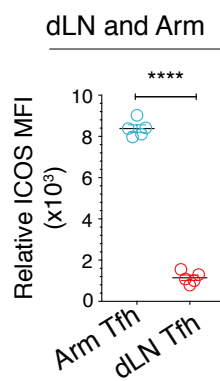

**Figure S4. dLN cell diversity, Related to Figure 4.**

**(A)** Mean fluorescence intensity (MFI) of BCL6 and CD200 in CXCR5<sup>+</sup> or CCR7<sup>+</sup>GP66<sup>+</sup> dLN cells relative to naive CD4<sup>+</sup> splenocytes from tumor-free control mice. (Unpaired t-test, \*\* p < 0.005, \*\*\*\* p < 0.0001).

**(B)** Percentage of CD200<sup>hi</sup> cells out of CCR7<sup>+</sup>CXCR5<sup>+</sup> dLN cells.

**(C)** Top panel shows flow cytometry contour plots of CXCR5 vs. PD-1 in CD44<sup>hi</sup> CD4<sup>+</sup> dLN cells from MC38 and MC38-GP tumor-bearing mice. Bottom panel shows percentage of Tfh cells out of total CD44<sup>hi</sup> CD4<sup>+</sup> T cells in dLN (left) and total number of Tfh cells (right). (A-C) Data is representative of 17 mice analyzed in three experiments.

**(D)** Mean fluorescence intensity (MFI) levels of ICOS in Arm Tfh and dLN Tfh relative to naive CD4<sup>+</sup> splenocytes from tumor-free control mice (Unpaired t-test, p < 10<sup>-5</sup>). (A-C) Data is representative of 10 mice analyzed in two experiments.

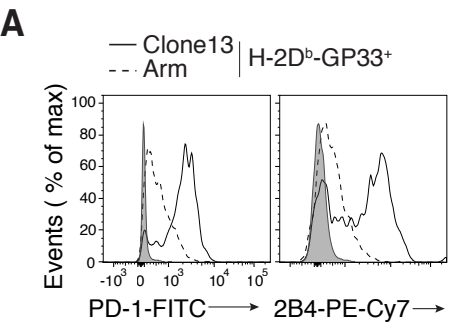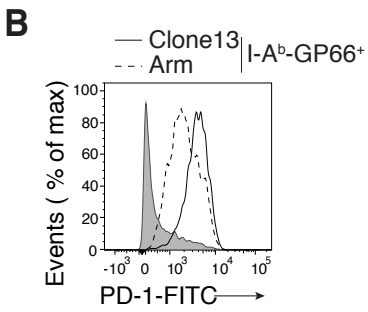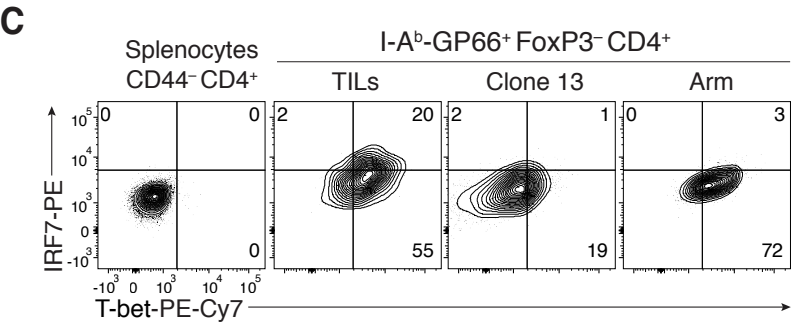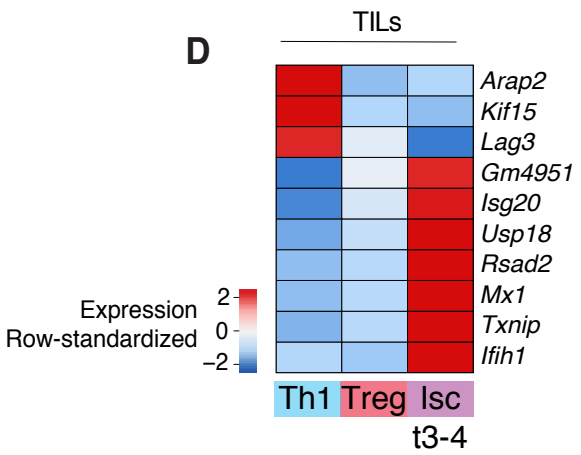

**Figure S5. Characterization of the exhaustion status in clone 13 cells and TILs, Related to Figure 5.**

**(A)** Overlaid protein expression of PD-1 or 2B4 in GP33<sup>+</sup> CD8<sup>+</sup> splenocytes from Arm- or Clone 13-infected mice.

**(B)** Overlaid protein expression of PD-1 in GP66<sup>+</sup> CD4<sup>+</sup> splenocytes from Arm- or Clone 13-infected mice. Grey shaded trace (A, B) is control from tumor-free mice.

**(C)** Flow cytometry contour plots of Tbet vs. IRF7 in Foxp3 GP66<sup>+</sup> TILs, Clone 13, or Arm cells, and in naive CD4<sup>+</sup> splenocytes from tumor-free control mice. (A-C) Data is representative of 10 mice analyzed in two experiments.

**(D)** Heatmap shows row-standardized expression of selected exhaustion genes across TIL Th1, Treg and Isc clusters (respectively clusters t1-2, t6-7 and t3-4 as shown in Fig. 1A).

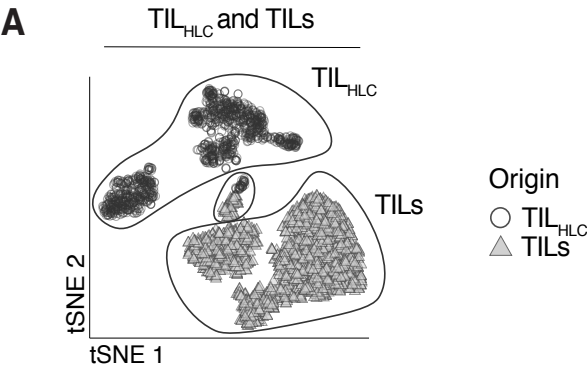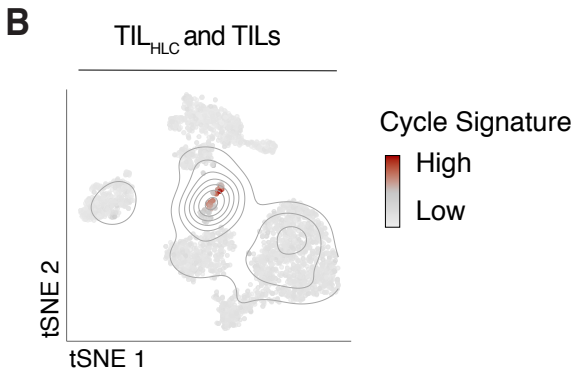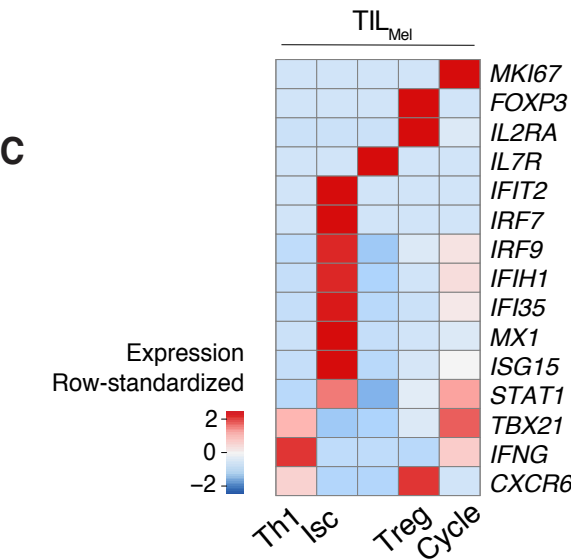

**Figure S6. Correspondence to human data and dysfunction gene signatures, Related to Figure 6.**

**(A-B)** Analysis of TIL<sub>HLC</sub> and TILs (as defined in text). **(A)** tSNE plots show cells grey-shaded by origin. **(B)** tSNE plots show cells color-coded by cell cycle signature activation level.

**(C)** Analysis of TIL<sub>Mel</sub> (as defined in text). Heatmap shows row-standardized expression of selected TIL characteristic genes across TIL<sub>Mel</sub> clusters.
